# Supplementary material for: The Proliferation of Pre-Pubertal Porcine Spermatogonia in Stirred Suspension Bioreactors Is Partially Mediated by the Wnt/β-Catenin Pathway
Source: MDPI journal article supplement (doi:10.3390/ijms222413549), 2021-12-17
Supplement: s1 [file s1]

## **Supplementary Methods: Measurement of O<sub>2</sub> concentration in liquid and gas phases**

### **Calculation of oxygen tension at 1084 m of altitude:**

The atmospheric pressure in Calgary, AB, Canada, located at 1084 m above sea level, is approximately 88.9 kPa [37]. According to Dalton's law, the partial pressure values of all relevant gases are equal to the atmospheric total pressure [14, 38]. In an appropriately humidified tissue culture incubator at atmospheric O<sub>2</sub> tension of 20.9%, 5% CO<sub>2</sub>, and 37 °C, the partial pressure of water p<sub>H<sub>2</sub>O</sub> is 6.28 kPa (constant) [14], and the partial pressure of pCO<sub>2</sub> is 4.44 kPa (5% of 88.9 kPa). The remaining dry room airpressure is 88.9-6.28-4.44= 78.18 kPa. Thus, the partial pressure of oxygen pO<sub>2</sub> is 16.34 kPa (20.9% of the remaining dry air pressure 78.18 kPa). This translates to 18.4% of atmospheric pressure (88.9 kPa). In a tri-gas incubator pre-set for 10% O<sub>2</sub> tension, the system measures % of O<sub>2</sub> in real time and keeps it constant at 10%. The partial pressure of 10% O<sub>2</sub> is then 8.89 kPa (10% of atmospheric pressure).

### **Estimation of oxygen concentration in the gas phase:**

The ideal gas law can be used to estimate the concentration of gas as follows:

$$PV=nRT \quad (1)$$

where P= pressure of the gas

(kPa); V= volume of the

gas (L);

n= number of molecules of gas

(mol); R= ideal gas content (8.31 J

K<sup>-1</sup> mol<sup>-1</sup>); T= temperature (K).

Using Equation (i), the concentration of O<sub>2</sub> in the gaseous phase of in the incubator set for ambient culture (pO<sub>2</sub>=16.34 kPa) is 6.34 mM, and the concentration of O<sub>2</sub> for the hypoxic culture (pO<sub>2</sub>=8.89 kPa) is 3.45 mM.

### **Estimation of oxygen concentration in media (liquid phase):**

The O<sub>2</sub> percentages (% v/v) from the spot sensors were used to determine the volume of O<sub>2</sub> in 1 L of media. Using Equation (i), the molar volume (V<sub>m</sub>=V/n=RT/P=28.99 L) at 37°C and a pressure of 88.9 kPa were determined. The number of moles from the volume of O<sub>2</sub> was then determined using the molar volume, which was then used to determine molarity.
