# Supplementary material for: The Proliferation of Pre-Pubertal Porcine Spermatogonia in Stirred Suspension Bioreactors Is Partially Mediated by the Wnt/β-Catenin Pathway
Source: MDPI journal article supplement (doi:10.3390/ijms222413549), 2021-12-17
Supplement: s1 [file s1]

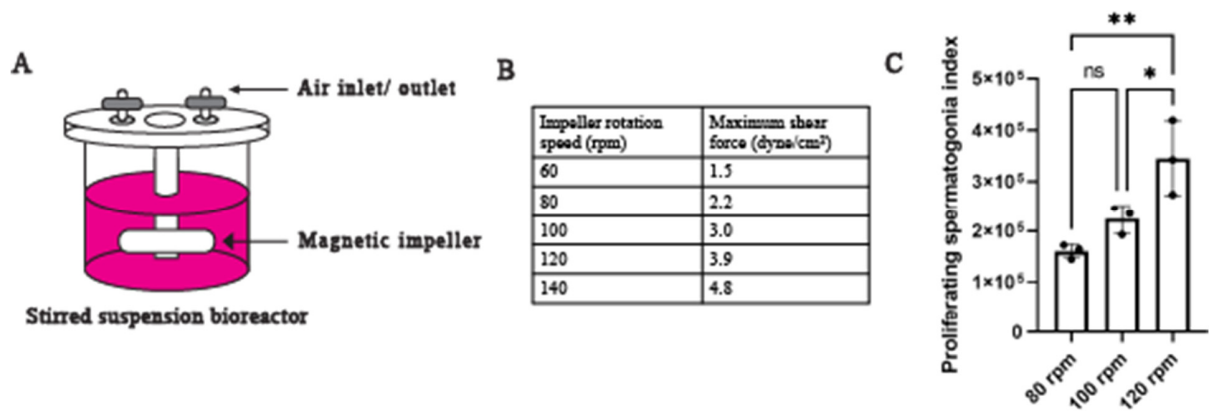

**Figure S1.** Stirred suspension bioreactor culture of porcine spermatogonia: (A) schematic of a 10 mL stirred suspension bioreactor; (B) maximum shear forces generated in the stirred suspension bioreactors; (C) proliferating spermatogonia index (number of EdU<sup>+</sup> UCHL1<sup>+</sup> cells) for 1-week-old porcine spermatogonia.  $n = 3$ , mean  $\pm$  SD.  $p > 0.05$  (ns),  $*p \leq 0.05$ ,  $**p \leq 0.01$ .

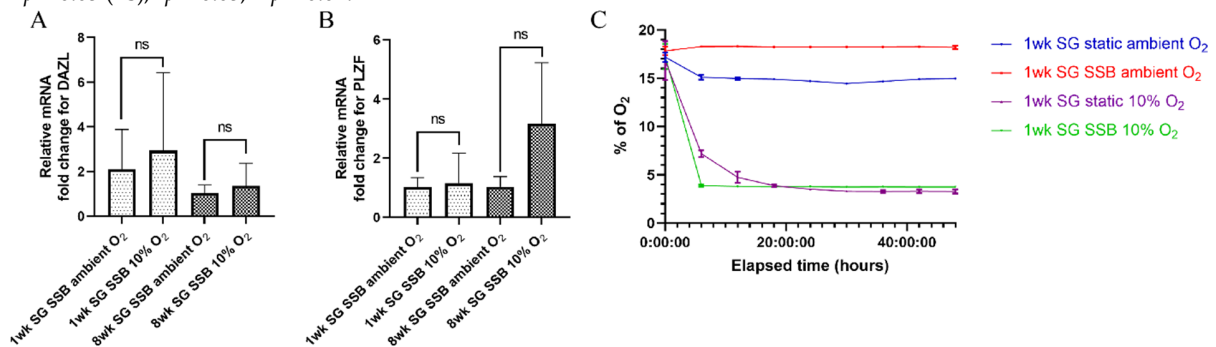

**Figure S2.** Gene expression of PLZF and DAZL: (A) relative mRNA fold change of DAZL for 1- and 8-week-old spermatogonia (SG); (B) relative mRNA fold change of PLZF for 1- and 8-week-old spermatogonia (SG).  $n = 3$ , mean  $\pm$  SD.  $p > 0.05$  (ns),  $*p \leq 0.05$ ,  $**p \leq 0.01$ ,  $***p \leq 0.001$ ,  $****p \leq 0.0001$ . (C) Percentage of O<sub>2</sub> measured via Oxygen Sensor Spots over the course of 48 h.

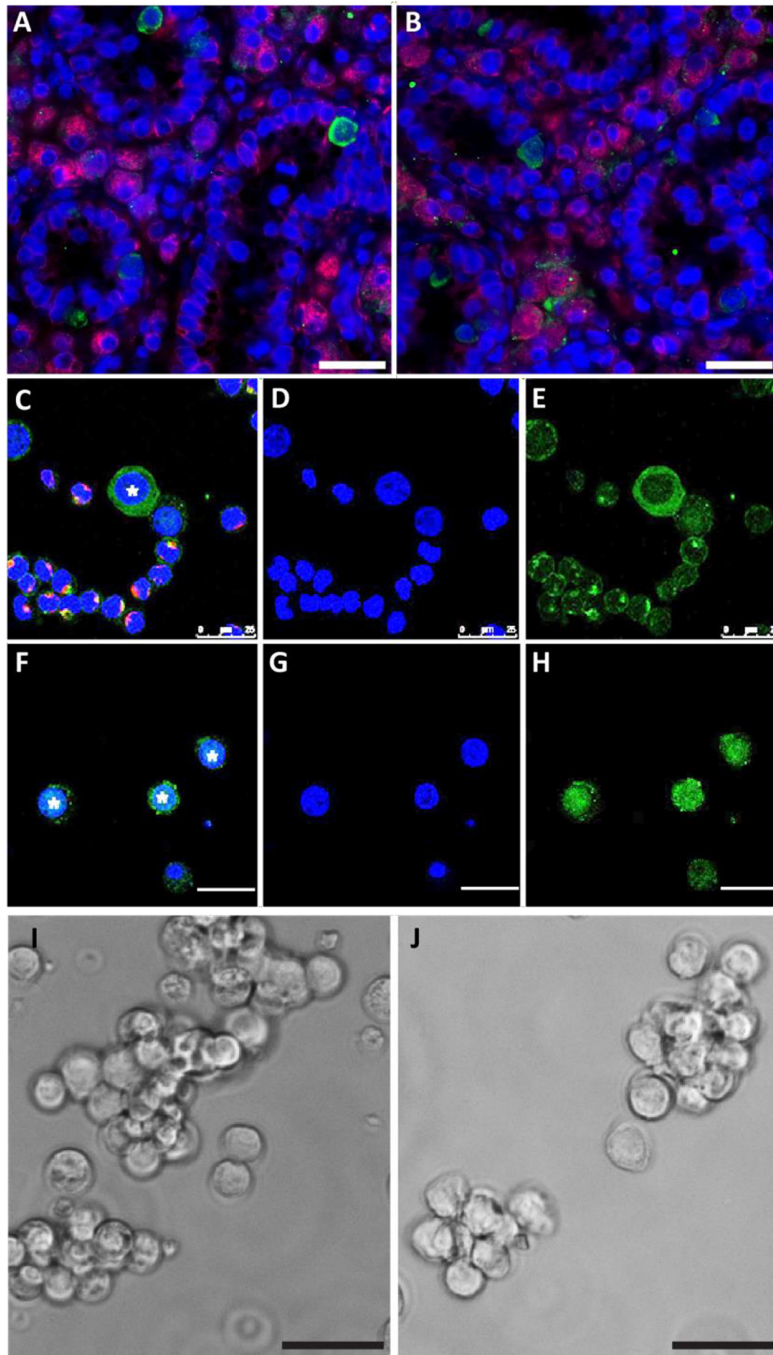

**Figure S3.** Immunofluorescence image of testis tissue and cells labeled for vimentin, UCHL1, and  $\beta$ -catenin, as well as brightfield images of spermatogonia clusters: (A,B) immunofluorescence image of UCHL1 (green) and vimentin (red) in 1-week-old (A) and 8-week-old testes (B); (C–H) immunofluorescence image of  $\beta$ -catenin (green) and vimentin (red): (C–E) static culture showing cytoplasmic  $\beta$ -catenin and (F–H) bioreactor culture showing nuclear  $\beta$ -catenin; (I,J) Brightfield image of 1-week-old (I) and 8-week-old (J) spermatogonia clusters after bioreactor culture. Scale bar 25  $\mu$ m.
